# Supplementary material
Source: PubMed Central journal article supplement (PMC5546024)
Supplement: 10.1074_M117.786376_jbc.M117.786376-1.pdf [file 10.1074_M117.786376_jbc.M117.786376-1.pdf]

## Endoplasmic Reticulum-Associated Degradation of the Renal Potassium Channel, ROMK, Leads to Type II Bartter Syndrome

Brigid M. O'Donnell, Timothy D. Mackie, Arohan R. Subramanya, and Jeffrey L. Brodsky

Tables depicting Primers and Yeast Strains used in this study with corresponding references

**Table S1: Oligonucleotide Primers**

| Primer | Use                            | Sequence                                  |
|--------|--------------------------------|-------------------------------------------|
| A198TF | A198T point mutation – forward | 5'-cgttcagcaagaatacgggtgatcagcaagc-3'     |
| A198TR | A198T point mutation - reverse | 5'-gcttgctgatcaccgtattcttctgaacg-3'       |
| R212PF | R212P point mutation - forward | 5'-ctgcctcctcatcccagtgcccaatcttag-3'      |
| R212PR | R212P point mutation - reverse | 5'-ctaagattggccactgggatgaggaggcag-3'      |
| H270YF | H270Y point mutation - forward | 5'-cccactgacgatctactacattatgaccacaac-3'   |
| H270YR | H270Y point mutation - reverse | 5'-gttggtgcaataatgtagtagatcgctcagtgagg-3' |
| Y314CF | Y314C point mutation - forward | 5'-gtccgcacgtcatgcgtcccagaggag-3'         |
| Y314CR | Y314C point mutation - reverse | 5'-ctcctctgggacgcatgacgtgcggac-3'         |

**Table S2: Yeast Strains**

| Strain                    | Relevant Genotype                                                                                             | Source     |
|---------------------------|---------------------------------------------------------------------------------------------------------------|------------|
| BY4742                    | <i>MATa his3 Δ, leu2 Δ, ura3 Δ</i>                                                                            | Invitrogen |
| <i>pdr5Δ</i>              | <i>MATa, his3 Δ, leu2 Δ, ura3 Δ, pdr5::KANMX</i>                                                              | Invitrogen |
| <i>SSA1</i>               | <i>MATa, his3-11,15, leu2-3,112, ura3-52, trp1-Δ1, lys2, ssa2-1(LEU), ssa3-1(TRP1), ssa4-2(LYS2)</i>          | Ref. [1]   |
| <i>ssa1-45</i>            | <i>MATa, his3-11,15, leu2-3,112, ura3-52, trp1-Δ1, lys2, ssa1-45, ssa2-1(LEU), ssa3-1(TRP1), ssa4-2(LYS2)</i> | Ref. [1]   |
| <i>cdc48-2</i>            | <i>MATa his3 Δ, leu2 Δ, ura3 Δ, cdc48-2::KANMX</i><br>(Back-crossed 3X to BY4742)                             | Ref. [2]   |
| <i>trk1Δ trk2Δ</i>        | <i>MATa his3 Δ, leu2 Δ, ura3 Δ, lyp1 Δ, trk1::URA3, trk2::NATMX, can1::Ste2pr-HIS3</i>                        | Ref. [3]   |
| <i>trk1Δ trk2Δ vps23Δ</i> | <i>can1Δ::STE2pr-HIS3 lyp1Δ his3Δ1 leu2Δ0 ura3Δ0 met15Δ0 trk1Δ::URA trk2Δ::NAT vps23Δ::KANMX</i>              | Ref. [3]   |

## References

1. Becker, J., et al., *Functional interaction of cytosolic hsp70 and a DnaJ-related protein, Ydj1p, in protein translocation in vivo*. Mol Cell Biol, 1996. **16**(8): p. 4378-86.
2. Moir, D., et al., *Cold-sensitive cell-division-cycle mutants of yeast: isolation, properties, and pseudoreversion studies*. Genetics, 1982. **100**(4): p. 547-63.

3. Kolb, A.R., et al., *ESCRT regulates surface expression of the Kir2.1 potassium channel*. Mol Biol Cell, 2014. **25**(2): p. 276-89.
